# Supplementary material
Source: publisher figshare collection journal article supplement (https://sage.figshare.com/ndownloader/files/12785054)
Supplement: Supplementary file 1 [file 12785054]

**Table 1** Criteria to assess the risk of bias, from the Methods Guide for Effectiveness and Comparative Effectiveness Reviews

| <b>Risk of bias</b> | <b>Criterion</b>                                                                                                                                                                                                        | <b>RCTs</b> | <b>NRCTs</b> |
|---------------------|-------------------------------------------------------------------------------------------------------------------------------------------------------------------------------------------------------------------------|-------------|--------------|
| Selection bias      | Was the allocation sequence generated?                                                                                                                                                                                  | X           |              |
|                     | Was the allocation of treatment adequately concealed?                                                                                                                                                                   | X           |              |
|                     | Were participants analysed within the groups they were originally assigned to?                                                                                                                                          | X           | X            |
|                     | Did the study apply inclusion/exclusion criteria uniformly to all comparison groups?                                                                                                                                    |             | X            |
|                     | Did the strategy for recruiting participants into the study differ across study groups?                                                                                                                                 |             | X            |
|                     | Does the design or analysis control account for important confounding and modifying variables through matching, stratification, multivariable analysis, or other approaches?                                            | X           | X            |
| Performance bias    | Did researchers rule out any impact from a concurrent intervention or an unintended exposure that might bias results?                                                                                                   | X           | X            |
|                     | Did the study maintain fidelity to the intervention protocol?                                                                                                                                                           | X           | X            |
| Attrition bias      | If attrition (overall or differential nonresponse, dropout, loss to follow-up, or exclusion of participants) was a concern, were missing data handled appropriately (e.g., intention-to-treat analysis and imputation)? | X           | X            |

|                |                                                                                                                                |   |   |
|----------------|--------------------------------------------------------------------------------------------------------------------------------|---|---|
| Detection bias | In prospective studies, was the length of follow-up different between the groups?                                              | X | X |
|                | Were the outcome assessors blinded to the intervention or exposure status of participants?                                     | X | X |
|                | Were outcomes assessed/defined using valid and reliable measures, implemented consistently across all study participants?      | X | X |
|                | Were confounding variables assessed using valid and reliable measures, implemented consistently across all study participants? |   | X |
| Reporting bias | Were the potential outcomes prespecified by the researchers? Are all prespecified outcomes reported?                           | X | X |

*Note.* RCTs = randomised controlled trials; NRCTs = non-randomised controlled trials.

**Table 2** Characteristics and outcomes of the studies included in the review

| Study and design                  | Sample description <sup>a</sup> :                                                                                                                                                     | Theoretical framework | Intervention characteristics and control condition                                                                                                                                                                                                                                                                                                                                        | Duration of Intervention and follow-up     | Physical activity measures                                                                                                                                                                        | Physical activity outcomes                                                                                                                                                                                                                 | Physical activity mediators             |
|-----------------------------------|---------------------------------------------------------------------------------------------------------------------------------------------------------------------------------------|-----------------------|-------------------------------------------------------------------------------------------------------------------------------------------------------------------------------------------------------------------------------------------------------------------------------------------------------------------------------------------------------------------------------------------|--------------------------------------------|---------------------------------------------------------------------------------------------------------------------------------------------------------------------------------------------------|--------------------------------------------------------------------------------------------------------------------------------------------------------------------------------------------------------------------------------------------|-----------------------------------------|
|                                   |                                                                                                                                                                                       |                       |                                                                                                                                                                                                                                                                                                                                                                                           | period                                     |                                                                                                                                                                                                   |                                                                                                                                                                                                                                            | outcomes                                |
| Boyle et al <sup>26</sup><br>NRCT | University students enrolled in a health course<br>n=178 <sup>b</sup><br>M=46 <sup>b</sup> F=132 <sup>b</sup><br>Mean age=21.1(4.47) <sup>b</sup><br>Lost to follow-up: not specified | SCT                   | <i>Intervention:</i> participant were assisted by a peer-educator, which boosted outcome expectations and self-efficacy by enabling performance attainments, providing vicarious experience, and delivering verbal persuasion. Peer educators created a tailored exercise program for participants<br><i>Control:</i> participants had to attempt to change behavior without outside help | Intervention: 1 semester<br>Follow-up: N/A | Instrument: self-administered items from the National Health Interview Survey.<br>Measures: energy expenditure (kilocalories/kg/day) and total PA (frequency × duration/week) in the past 2 weeks | Women in the intervention group had a smaller reduction in PA than women in the control group. No significant effects for men. “Inactive” intervention group participants increased their PA and energy expenditure, contrary to controls. | N/A                                     |
| Bray et al <sup>27</sup><br>RCT   | Freshmen students<br>n=935                                                                                                                                                            | SCT                   | <i>First-year students brochure intervention:</i> participants received a brochure providing information                                                                                                                                                                                                                                                                                  | Intervention: N/A                          | Instrument: MPA and VPA sections of the 2003 Behavior Risk                                                                                                                                        | All groups showed declines in MVPA. Participants in the                                                                                                                                                                                    | No difference between interventions and |

|                  |                                       |     |                                                |               |                       |                       |                    |
|------------------|---------------------------------------|-----|------------------------------------------------|---------------|-----------------------|-----------------------|--------------------|
|                  | M=100 <sup>b</sup> F=155 <sup>b</sup> |     | on exercise prescription,                      | Follow-up: 6  | Factor Surveillance   | First-year brochure   | control groups in  |
|                  | Mean                                  |     | strategies to facilitate self-                 | weeks         | System interview      | intervention showed a | action planning    |
|                  | age=17.94(0.66) <sup>b</sup>          |     | perceptions and motivation to <b>PA</b>        |               | schedule.             | smaller decrease in   | and scheduling     |
|                  | Lost to follow up:                    |     | <i>Canada's PA Guide intervention:</i>         |               | Measures:             | MVPA than the control | self-efficacy      |
|                  | 72.7%                                 |     | participants received a brochure               |               | minutes/week of       | group.                |                    |
|                  |                                       |     | containing information on                      |               | MVPA in the past 8    | No difference between |                    |
|                  |                                       |     | exercise prescription and health               |               | months (for baseline) | the Canada's PA Guide |                    |
|                  |                                       |     | benefits of PA                                 |               | and in the past 6     | condition and the     |                    |
|                  |                                       |     | <i>Control:</i> no treatment                   |               | weeks (for follow-up) | control condition     |                    |
| Brown et         | Freshmen                              | SCT | <i>Intervention:</i> <b>practical physical</b> | Intervention: | Instrument: Global    | Participants in the   | No effects on      |
| al <sup>28</sup> | students living in                    |     | <b>activities</b> , group workshops with a     | 20 weeks      | Physical Activity     | intervention group    | outcome            |
| <b>NRCT</b>      | university                            |     | counsellor, <b>seminars focused on</b>         | Follow-up:    | Questionnaire,        | were more active      | expectations.      |
|                  | residences                            |     | PA benefits, recommendations,                  | N/A           | Recreational Activity | (MVPA) at post-test   | Intervention       |
|                  | n=174                                 |     | planning, problem-solving,                     |               | section.              | than controls         | group had higher   |
|                  | M=73 F=101                            |     | knowledge sharing, self-                       |               | Measure:              |                       | scores in action   |
|                  | Mean                                  |     | monitoring, social support, goal               |               | minutes/week of       |                       | planning than      |
|                  | age=17.97(0.95)                       |     | setting, consciousness-rising, time            |               | MVPA in the past 30   |                       | control group.     |
|                  | Lost to follow-                       |     | management). Participants                      |               | days.                 |                       | Action planning    |
|                  | up: 65.5%                             |     | received a PA guidebook.                       |               |                       |                       | was a predictor of |
|                  |                                       |     | <i>Control:</i> no treatment                   |               |                       |                       | MVPA.              |

|                                        |                                                                                                                                                                   |                |                                                                                                                                                                                                                                                                                                                                                                                    |                                           |                                                                                                                                                                |                                                                                                                                                                              |                                                                                             |
|----------------------------------------|-------------------------------------------------------------------------------------------------------------------------------------------------------------------|----------------|------------------------------------------------------------------------------------------------------------------------------------------------------------------------------------------------------------------------------------------------------------------------------------------------------------------------------------------------------------------------------------|-------------------------------------------|----------------------------------------------------------------------------------------------------------------------------------------------------------------|------------------------------------------------------------------------------------------------------------------------------------------------------------------------------|---------------------------------------------------------------------------------------------|
| Cavallo et al <sup>29</sup><br>RCT     | Female undergraduate students<br>n=134<br>Aged <25 years<br>Lost to follow-up: 10.5%                                                                              | Social support | <i>Intervention:</i> participants used a website providing information on PA, and a tool <b>for self-monitoring</b> and goal setting, and were invited to join a Facebook group to exchange social support. A moderator elicited participation and answered to questions<br><br><i>Control:</i> participants <b>used a</b> limited version of the website, without self-monitoring | Intervention: 12 weeks<br>Follow-up: N/A  | Instrument: Paffenbarger Activity Questionnaire (adapted for online use).<br><br>Measures: Kcal/week of Total PA, VPA, MPA, and LPA                            | No significant difference in PA changes between intervention and control group                                                                                               | No significant differences in social support changes between intervention and control group |
| Claxton and Wells <sup>30</sup><br>RCT | Students enrolled in a health education course<br>n=582<br>M=206 <sup>b</sup> F=159 <sup>b</sup><br>Mean age=19.43(3.41) <sup>b</sup><br>Lost to follow-up: 37.3% | N/A            | <i>Intervention:</i> weekly PA homework ( <b>used as part of final grades</b> ) assigned to participants: keeping a log of the type, length, and intensity of daily PA to be submitted to instructors, and engaging in at least 30 minutes of PA for 3 days<br><br><i>Control:</i> regular health classes                                                                          | Intervention: 12 weeks.<br>Follow-up: N/A | Instrument: Questions from the National Health Interview Survey.<br><br>Measures: days/week of MPA, VPA, endurance, flexibility and weight management exercise | Intervention group showed an increase in days/week of weight management activity, whereas control group did not.<br>Control group showed an increase in flexibility exercise | N/A                                                                                         |

|                                          |                                                                                                                                    |                              |                                                                                                                                                                                                                                                                                                                                                  |                                                                                         |                                                                                                                                            |                                                                                            |                                                                                                                                                         |
|------------------------------------------|------------------------------------------------------------------------------------------------------------------------------------|------------------------------|--------------------------------------------------------------------------------------------------------------------------------------------------------------------------------------------------------------------------------------------------------------------------------------------------------------------------------------------------|-----------------------------------------------------------------------------------------|--------------------------------------------------------------------------------------------------------------------------------------------|--------------------------------------------------------------------------------------------|---------------------------------------------------------------------------------------------------------------------------------------------------------|
| Epton et al <sup>41</sup><br><b>RCT</b>  | Undergraduate students<br>n=1445<br>58% females<br>Mean age=18.9<br>Lost to follow-up: 23.4%                                       | TPB; Self-affirmation theory | <i>Intervention:</i> participants <b>were asked to use a website containing</b> a profile page with self-affirmation manipulation, theory-based messages relevant to health behaviors, and a planner to form implementation intentions. <b>An app was provided</b> to access the website from the smartphone<br><br><i>Control:</i> no treatment | Intervention: 6 months<br><br>Follow-up: N/A                                            | Instrument: short form of the International Physical Activity Questionnaire.<br><br>Measure: MET*minutes/week of MVPA in the previous week | No significant difference in PA between intervention and control groups                    | No significant differences in descriptive and injunctive norm, perceived control, self-efficacy, intention, plan, and attitude toward PA between groups |
| Franko et al <sup>23</sup><br><b>RCT</b> | Full-time undergraduate students<br>n=476<br>M=204 F=268<br>Mean age=20.1(1.7)<br>Lost to follow-up: 6.7% at post-test; 11.8% at 3 | SCT                          | Participants used a website <b>containing</b> information on nutrition and PA, <b>interactive activities, goal setting, a self-assessment questionnaire</b> , and questions used to provide feedback to participants.<br><br><i>Intervention 1:</i> participants used the website for two 45-minute                                              | Intervention 1: 2 weeks<br><br>Intervention 2: 4 weeks<br><br>Follow-up: 3 and 6 months | Instrument: International Physical Activity Questionnaire.<br><br>Measure: MET*minutes/week on MVPA in the previous week                   | No significant differences in PA between intervention and control groups at any time point | At 3 months, barriers were lower in Intervention 1 than in control. At 6 months, both interventions reported lower barriers than control.               |

|                          |                                                                                                                                                                                                                                   |                                                                                                                                                       |
|--------------------------|-----------------------------------------------------------------------------------------------------------------------------------------------------------------------------------------------------------------------------------|-------------------------------------------------------------------------------------------------------------------------------------------------------|
| months; 12% at 6 months. | <p>sessions (2 weeks from one another)</p> <p><i>Intervention 2:</i> participants used the website for two 45-minute sessions and a subsequent booster session (2 weeks from one another)</p> <p><i>Control:</i> no treatment</p> | <p>At 3 months, beliefs on PA benefits were higher in both interventions than in control; the difference remained at 6 months for Intervention 1.</p> |
|--------------------------|-----------------------------------------------------------------------------------------------------------------------------------------------------------------------------------------------------------------------------------|-------------------------------------------------------------------------------------------------------------------------------------------------------|

|                            |                                                                         |                                                                                                     |                                                                                                                                                                                                                                                                                                                 |                                                |                                                                                                                      |                                                                                                              |     |
|----------------------------|-------------------------------------------------------------------------|-----------------------------------------------------------------------------------------------------|-----------------------------------------------------------------------------------------------------------------------------------------------------------------------------------------------------------------------------------------------------------------------------------------------------------------|------------------------------------------------|----------------------------------------------------------------------------------------------------------------------|--------------------------------------------------------------------------------------------------------------|-----|
| Greene et al <sup>31</sup> | Full-time freshmen, or sophomores, or juniors students                  | Dick and Carey's Model of Instructional Design; Keller's Instructional Motivational Model; TMM; SCT | <i>Intervention:</i> the intervention consisted in 10 <b>online</b> lessons, focused on attitudes, self-efficacy, weight management <b>and</b> goal setting. Participants <b>had</b> a profile page <b>displaying</b> measurements for each assessment, goals, and self-reported PA compared to recommendations | Intervention: 10 weeks<br>Follow-up: 12 months | Instrument: International Physical Activity Questionnaire.<br>Measure: MET*minutes/week on MVPA in the previous week | Both group decreased their MVPA, but intervention group showed a smaller decrease in MVPA than control group | N/A |
| <b>RCT</b>                 | n=1689<br>62% females<br>Mean age=19.1(1.1)<br>Lost to follow-up: 62.8% |                                                                                                     |                                                                                                                                                                                                                                                                                                                 |                                                |                                                                                                                      |                                                                                                              |     |

|                                    |                                                                                                                                                     |                         |                                                                                                                                                                                                                                                                                                                                                                                                                                                        |                                              |                                                                                                                                                                                                                                                                 |                                                                                                                                                                                                                                                                                                                                             |                                                             |
|------------------------------------|-----------------------------------------------------------------------------------------------------------------------------------------------------|-------------------------|--------------------------------------------------------------------------------------------------------------------------------------------------------------------------------------------------------------------------------------------------------------------------------------------------------------------------------------------------------------------------------------------------------------------------------------------------------|----------------------------------------------|-----------------------------------------------------------------------------------------------------------------------------------------------------------------------------------------------------------------------------------------------------------------|---------------------------------------------------------------------------------------------------------------------------------------------------------------------------------------------------------------------------------------------------------------------------------------------------------------------------------------------|-------------------------------------------------------------|
| Hall and Fong <sup>21</sup><br>RCT | University students enrolled in a fitness course<br>n=81. M=4 F=77<br>Mean age=21.2(2.6)<br>Lost to follow-up: 3.7% at post-test; 30.9% at 6 months | Time Perspective Theory | <i>Time Perspective Intervention:</i> participants attended three weekly sessions substituted for a part of fitness classes, focused on helping them become more cognizant of long-term benefits of PA, and on long-term goal setting.<br><i>Goal-setting control intervention:</i> the intervention was similar to the Time Perspective group, except for the temporal orientation<br><i>Control:</i> participants attended fitness classes per usual | Intervention: 3 weeks<br>Follow-up: 6 months | Instruments: 30-day recall measure derived from the Stanford 7-Day Recall. Interview-based Physical Activity Recall Measures: Hours of VPA in the past 30 days, minutes of MPA, VPA, very hard PA, strength exercise, and flexibility exercise in the past week | No effect on 30-days<br>VPA. At post-test, time perspective group showed a greater increase in 7-days VPA than control, but not greater than goal-setting group. No effect on other measures and at follow-up. Time perspective group showed a smaller decrease in strength exercises than control, but not smaller than goal-setting group | No intervention effect on long-term thinking about exercise |
| Hivert et al <sup>24</sup><br>RCT  | Full-time first or second-year students<br>n=115                                                                                                    | N/A                     | <i>Intervention:</i> participants attended 23 interactive seminars over 2 years, focused on complications of weight gain, exercise                                                                                                                                                                                                                                                                                                                     | Intervention: 2 years<br>Follow-up: N/A      | Instrument: Canadian Fitness Survey questionnaire.                                                                                                                                                                                                              | No statistically significant differences between intervention and control group                                                                                                                                                                                                                                                             | N/A                                                         |



|                    |                                    |                   |
|--------------------|------------------------------------|-------------------|
| M=21 F=94          | categories, expected benefits and  | Measure: Total PA |
| Mean age           | recommendations, problem-          | Kcal/kg/year      |
| (intervention      | solving, goal-setting, self-       |                   |
| group)=19.9(0.2)   | monitoring, and strategies to      |                   |
| Mean age(control   | maintain a healthy lifestyle. Role |                   |
| group)=19.5(0.2)   | models of active lifestyle were    |                   |
| Lost to follow-up: | offered                            |                   |
| 16.5%              | Control: no treatment              |                   |

|                                           |                                                                                                   |                                                                    |                                                                                                                                                                                                                                                                                                                                                                                             |                                                 |                                                                                                                                                                    |                                                                     |                                                                       |
|-------------------------------------------|---------------------------------------------------------------------------------------------------|--------------------------------------------------------------------|---------------------------------------------------------------------------------------------------------------------------------------------------------------------------------------------------------------------------------------------------------------------------------------------------------------------------------------------------------------------------------------------|-------------------------------------------------|--------------------------------------------------------------------------------------------------------------------------------------------------------------------|---------------------------------------------------------------------|-----------------------------------------------------------------------|
| Kattelman<br>n et al <sup>32</sup><br>RCT | Full-time students<br>n=1639<br>67% females<br>Mean<br>age=19.3(1.1)<br>Lost to follow-up:<br>41% | Dick and<br>Carey's<br>model of<br>Instructional<br>Design;<br>TTM | Intervention: participants had<br>access to a website containing 21<br>educational lessons addressing<br>eating behavior, PA, stress<br>management, and healthy weight<br>management. On the website,<br>participants could view their<br>goals, progresses, and behavior<br>recommendations. Participants<br>received e-mail contained stage-<br>tailored videos to reinforce<br>behavior. | Intervention:<br>15 months<br>Follow-up:<br>N/A | Instrument:<br>International Physical<br>Activity<br>Questionnaire.<br>Measures:<br>MET*minutes/week<br>of total PA, walking,<br>MPA, VPA, in the<br>previous week | No intervention effects<br>on total PA, walking,<br>MPA, and on VPA | No difference<br>between groups in<br>stage of readiness<br>to change |
|-------------------------------------------|---------------------------------------------------------------------------------------------------|--------------------------------------------------------------------|---------------------------------------------------------------------------------------------------------------------------------------------------------------------------------------------------------------------------------------------------------------------------------------------------------------------------------------------------------------------------------------------|-------------------------------------------------|--------------------------------------------------------------------------------------------------------------------------------------------------------------------|---------------------------------------------------------------------|-----------------------------------------------------------------------|

*Control: no treatment*

|                                  |                                                                  |                 |                                                                                                                                                                                                                                                                                        |                                          |                                                                                                     |                                                                                                                                                                                                                           |     |
|----------------------------------|------------------------------------------------------------------|-----------------|----------------------------------------------------------------------------------------------------------------------------------------------------------------------------------------------------------------------------------------------------------------------------------------|------------------------------------------|-----------------------------------------------------------------------------------------------------|---------------------------------------------------------------------------------------------------------------------------------------------------------------------------------------------------------------------------|-----|
| Kozak et al <sup>25</sup>        | Undergraduate students                                           | Prospect Theory | The study compared the effect of gain/loss framed messages in normal-weight and overweight students.                                                                                                                                                                                   | Intervention: 2-hours session + 2 weeks  | Instrument: modified version of the Godin Leisure Time Exercise Questionnaire; recording sheets.    | Overweight gain-framed messages group increased cardiorespiratory activity. Normal-weight gain-framed messages, normal-weight loss-framed messages and overweight gain-framed messages groups increased strength exercise | N/A |
| Factorial RCT                    | n=64.<br>82.8% females<br>Mean age=21<br>Lost to follow-up: 7.8% |                 | <i>Intervention:</i> participants attended an information session and an exercise instruction session. In the first session, participants received gain or loss framed messages (according to their group) respectively about PA benefits or loss of benefits in sedentary lifestyles. | Follow-up: N/A                           | Measures: minutes/week of cardiorespiratory MPA and VPA; number of strength training exercises/week |                                                                                                                                                                                                                           |     |
| Le Cheminant et al <sup>33</sup> | Freshmen students                                                | N/A             | <i>Intervention:</i> participants received a pedometer, and a standard daily steps goal. Participants received an activity record to record their daily step count, and weekly e-mails containing reminders,                                                                           | Intervention: 27 weeks<br>Follow-up: N/A | Instruments: DIGI-WALKER SW-701 pedometer.<br>FANTASTIC Questionnaire.                              | No effect of the intervention on PA                                                                                                                                                                                       | N/A |
| RCT                              | M=17, F=29<br>Aged 18-24 years                                   |                 |                                                                                                                                                                                                                                                                                        |                                          |                                                                                                     |                                                                                                                                                                                                                           |     |

Lost to follow-up: 26.1%

information **on PA** benefits, and suggestions to obtain sufficient PA

*Control:* participants were advised to maintain their activity patterns

Measures: steps/day; times/week performing MPA and VPA in the past month

|                           |                                                                      |     |                                                                                                                                                                                                                                                                                                  |                                         |                                                                                          |                                                                                                                                                                                            |                                                                                                                                                         |
|---------------------------|----------------------------------------------------------------------|-----|--------------------------------------------------------------------------------------------------------------------------------------------------------------------------------------------------------------------------------------------------------------------------------------------------|-----------------------------------------|------------------------------------------------------------------------------------------|--------------------------------------------------------------------------------------------------------------------------------------------------------------------------------------------|---------------------------------------------------------------------------------------------------------------------------------------------------------|
| Magoc et al <sup>34</sup> | Full-time or part-time students                                      | SCT | <i>Intervention:</i> 7 online lessons, <b>focused on</b> self-efficacy, self-regulation, planning, goal setting, barriers, social support, PA benefits, recommendations, suggestions and examples of exercises. Participants <b>received weekly assignments and</b> were asked to submit PA logs | Intervention: 6 weeks<br>Follow-up: N/A | Instrument: short form of the International Physical Activity Questionnaire.             | Significant increase in days/week of MPA and in days/week of VPA for intervention group, whereas control reported no changes. No changes in minutes/week of MPA and in minutes/week of VPA | No intervention effect on self-efficacy, self-regulation plans, self-regulation goals, expectancies, family social support, and friends' social support |
| <b>RCT</b>                | n=117<br>Mean age=25.47(6.17) <sup>b</sup><br>Lost to follow-up: 11% |     | <i>Control:</i> participants received only basic information on the importance of PA, and were asked to complete PA logs                                                                                                                                                                         |                                         | Measures: days/week of MPA, days/week of VPA, minutes/weeks of MPA, minutes/weeks of VPA |                                                                                                                                                                                            |                                                                                                                                                         |

|                                           |                                                                                                                            |                        |                                                                                                                                                                                                                                                                                                                                                                                        |                                                          |                                                                                                                                   |                                                                                                                                                                                               |                                                                                                                             |
|-------------------------------------------|----------------------------------------------------------------------------------------------------------------------------|------------------------|----------------------------------------------------------------------------------------------------------------------------------------------------------------------------------------------------------------------------------------------------------------------------------------------------------------------------------------------------------------------------------------|----------------------------------------------------------|-----------------------------------------------------------------------------------------------------------------------------------|-----------------------------------------------------------------------------------------------------------------------------------------------------------------------------------------------|-----------------------------------------------------------------------------------------------------------------------------|
| Mailey et al <sup>42</sup><br><b>RCT</b>  | University students receiving mental health counselling<br>n=47<br>68.1% females<br>Mean age=25<br>Lost to follow-up: 7.8% | SCT                    | <i>Intervention:</i> participants had access to a website and attended bimonthly counselling meetings. Topics addressed were PA benefits, exercise safety, self-monitoring, self-efficacy, outcome expectations, goal setting, overcoming barriers to PA, and suggestions for maintaining PA. Participant wore a pedometer and received feedbacks.<br><br><i>Control:</i> no treatment | Intervention: 10 weeks<br>Follow-up: N/A                 | Instrument: ActiGraph accelerometer.<br>Measures: 1-minute epochs, 5 days PA, 10 hours/day                                        | Intervention group showed a greater increase in PA compared to the control group, considered statistically significant by the authors, due to the characteristics of the sample ( $p = .08$ ) | Barriers self-efficacy and exercise self-efficacy declined during the intervention period in intervention and control group |
| Martens et al <sup>43</sup><br><b>RCT</b> | n=67<br>Intervention: 84.4% females<br>Mean age=19.61(2.41)<br>Control: 80% females                                        | Motivational interview | Intervention: participants attended a one-on-one motivational interviewing session. It included discussion on the decisional balance, personalized PA feedback, addressing barriers to                                                                                                                                                                                                 | Intervention: 1 30-minutes session<br>Follow-up: 1 month | Instrument/measures: questions asking number of days/week of 20+ minutes of VPA, and number of days/week of 30+ minutes of MPA in | Participants in the intervention group reported more days/week of 20+ minutes of VPA and more minutes/week of VPA than controls.                                                              | N/A                                                                                                                         |

|                 |                                    |                        |                         |
|-----------------|------------------------------------|------------------------|-------------------------|
| Mean            | PA, goal setting, and suggestions  | the last weeks. To the | No statistically        |
| age=19.61(2.14) | for increasing PA                  | 83% of the             | significant differences |
| Lost to follow- | <i>Control:</i> participants were  | participants, it was   | on moderate PA          |
| up= 0%          | provided with tip sheets including | also asked the         |                         |
|                 | strategies for increasing PA       | number of minutes of   |                         |

#### MPA and VPA

|                        |                                     |     |                                                   |               |                        |                         |                    |
|------------------------|-------------------------------------|-----|---------------------------------------------------|---------------|------------------------|-------------------------|--------------------|
| Ng et al <sup>35</sup> | Freshmen                            | SCT | <i>Intervention:</i> participants <b>attended</b> | Intervention: | Instrument: Godin      | No intervention effects | No intervention    |
| <b>NRCT</b>            | students                            |     | a physical education course. The                  | 10 weeks      | Leisure Time           | of PA                   | effects on         |
|                        | n=331                               |     | contents were fitness equipment                   | Follow-up:    | Exercise               |                         | exercise self-     |
|                        | Intervention:                       |     | usage, skinfold measurements,                     | N/A           | Questionnaire          |                         | efficacy, motives, |
|                        | M=50 <sup>b</sup> F=43 <sup>b</sup> |     | weight and circuit training,                      |               | Measures:              |                         | and barriers       |
|                        | Mean                                |     | aerobic <b>exercises</b> , endurance run,         |               | times/week of          |                         |                    |
|                        | age=19.4(1) <sup>b</sup>            |     | and relaxation. Participants took                 |               | engaging in 15+        |                         |                    |
|                        | Control: M=53 <sup>b</sup>          |     | part in activities addressing self-               |               | minutes of LPA,        |                         |                    |
|                        | F=94 <sup>b</sup>                   |     | efficacy, motives, and barriers                   |               | MPA, and VPA,          |                         |                    |
|                        | Mean                                |     | <i>Control:</i> no treatment                      |               | corrected by intensity |                         |                    |
|                        | age=19.5(1.8) <sup>b</sup>          |     |                                                   |               | coefficients           |                         |                    |
|                        | Lost to follow-up:                  |     |                                                   |               |                        |                         |                    |
|                        | 48%                                 |     |                                                   |               |                        |                         |                    |

|                             |                                                                                                                                                                                      |                          |                                                                                                                                                                                                                                                                                        |                                            |                                                                                                                                             |                                                                                                                                                                                                   |                                                                                                                                                |
|-----------------------------|--------------------------------------------------------------------------------------------------------------------------------------------------------------------------------------|--------------------------|----------------------------------------------------------------------------------------------------------------------------------------------------------------------------------------------------------------------------------------------------------------------------------------|--------------------------------------------|---------------------------------------------------------------------------------------------------------------------------------------------|---------------------------------------------------------------------------------------------------------------------------------------------------------------------------------------------------|------------------------------------------------------------------------------------------------------------------------------------------------|
| Okazaki et al <sup>36</sup> | n=84                                                                                                                                                                                 | SCT; Health belief model | <i>Intervention:</i> participants had access to a website containing goal-setting, scheduling, self-monitoring, information on PA (health behavior skills, body images, training), quizzes, and energy expenditure calculations. Participants received advice according to PA reported | Intervention: 1 year<br>Follow-up: N/A     | Instrument: short form of the International Physical Activity Questionnaire.<br>Measure: Kcal/day                                           | Only participants of the intervention group that at baseline did not engage in regular university sports showed greater level of PA than controls after the intervention                          | All participants of the intervention group progressed through stages of change whereas control group had no improvement                        |
| RCT                         | M=35 <sup>b</sup> F=14 <sup>b</sup><br>Mean age=19.1(1.3) <sup>b</sup><br>Control: M=15 <sup>b</sup> F=13 <sup>b</sup><br>Mean age=19.4(1.2) <sup>b</sup><br>Lost to follow-up: 8.3% |                          |                                                                                                                                                                                                                                                                                        |                                            |                                                                                                                                             |                                                                                                                                                                                                   |                                                                                                                                                |
| Parrott et al <sup>44</sup> | Sedentary university students<br>n=170<br>M=105 F=65<br>Mean age=20.2(0.9)<br>Lost to follow-up: 0%                                                                                  | TPB                      | <i>Positive framed messages</i><br><i>intervention:</i> participants received e-mails containing positive-framed messages about PA every other day for two weeks<br><i>Negative framed messages</i><br><i>intervention:</i> participants received e-mails containing negative-         | Intervention: 2 weeks<br>Follow-up: 1 week | Instrument: modified version of the Godin Leisure Time Exercise Questionnaire.<br>Measure: times/week engaging in 30+ minutes of MPA or VPA | Positive-framed messages group had higher PA scores than control group at post-test and at follow-up, <b>and</b> higher PA scores than negative-framed messages group at post-test and at follow- | At follow-up, the positive-framed messages group scored higher than the control group on intention, affective attitude, instrumental attitude, |
| RCT                         |                                                                                                                                                                                      |                          |                                                                                                                                                                                                                                                                                        |                                            |                                                                                                                                             |                                                                                                                                                                                                   |                                                                                                                                                |

|                                           |                                                                                                                                              |                                         |                                                                                                                                                                                                                                                                                                                                                                                               |                                                       |                                                                                                                                                                                           |                                                                                                                                        |                                                                                           |
|-------------------------------------------|----------------------------------------------------------------------------------------------------------------------------------------------|-----------------------------------------|-----------------------------------------------------------------------------------------------------------------------------------------------------------------------------------------------------------------------------------------------------------------------------------------------------------------------------------------------------------------------------------------------|-------------------------------------------------------|-------------------------------------------------------------------------------------------------------------------------------------------------------------------------------------------|----------------------------------------------------------------------------------------------------------------------------------------|-------------------------------------------------------------------------------------------|
|                                           |                                                                                                                                              |                                         | framed messages about PA every<br>other day for two weeks<br><i>Control</i> : no treatment                                                                                                                                                                                                                                                                                                    |                                                       |                                                                                                                                                                                           | up as regards<br>participants with low<br>baseline PA.                                                                                 | subjective norm<br>and perceived<br>behavioral control                                    |
| Priebe and<br>Spink <sup>22</sup><br>RCT  | University<br>students<br>n=310<br>M=45 <sup>b</sup> F=166 <sup>b</sup><br>Mean<br>age=21.6(4.2) <sup>b</sup><br>Lost to follow-up:<br>31.9% | Theory of<br>normative<br>conduct       | Participants received four e-mails,<br>with motivational information.<br>Reasons for being active were<br>specific to the experimental group<br><i>Descriptive norm intervention</i> :<br>descriptive norms<br><i>Health promoted intervention</i> :<br>health<br><i>Appearance promoted</i><br><i>intervention</i> : appearance<br><i>Control</i> : messages simply<br>promoted being active | Intervention:<br>15 days<br>Follow-up:<br>N/A         | Instrument: Godin<br>Leisure Time<br>Exercise<br>Questionnaire.<br>Measure: times/week<br>of engaging in 15+<br>minutes of LPA,<br>MPA and VPA,<br>corrected by intensity<br>coefficients | No significant<br>differences in PA<br>levels change between<br>the descriptive norm<br>intervention group and<br>the other conditions | N/A                                                                                       |
| Quintiliani<br>et al <sup>37</sup><br>RCT | Female university<br>students<br>n=408                                                                                                       | Elaboration<br>Likelihood<br>Model; TTM | Participants visualized online<br>messages about one among six<br>health-related topics, including a<br>feedback comparing participants'<br>behavior to recommendations, a                                                                                                                                                                                                                    | Intervention:<br>one session<br>Follow-up: 1<br>month | Instrument: questions<br>from the U.S.<br>Behavioral Risk<br>Factor Surveillance<br>Survey.                                                                                               | At follow-up change in<br>VPA was significantly<br>greater in the expert<br>group than in the<br>control group. No                     | At post-test,<br>change in self-<br>efficacy and goal<br>commitment was<br>greater in the |

|                                                                                  |                                                                                                                                                                                                                                                                                                                                                                                                                                                  |                                                     |                                                          |                                                                                                                                                                                 |
|----------------------------------------------------------------------------------|--------------------------------------------------------------------------------------------------------------------------------------------------------------------------------------------------------------------------------------------------------------------------------------------------------------------------------------------------------------------------------------------------------------------------------------------------|-----------------------------------------------------|----------------------------------------------------------|---------------------------------------------------------------------------------------------------------------------------------------------------------------------------------|
| Aged 18-21=210,<br>aged 22-29=146,<br>aged ≥30=52<br>Lost to follow-up:<br>48.5% | testimonial of behavior change,<br>answers tailored to participants’<br>reported barriers, and a stage-<br>tailored action plan.<br><br><i>Choice group: participants<br/>autonomously selected the topic<br/>Expert group: the topic was<br/>chosen by an expert on the basis<br/>of a baseline survey indicating<br/>whether the participant met PA<br/>recommendations<br/>Control: participants received<br/>messages on reducing stress</i> | Measures:<br><br>minutes/week of<br><br>MPA and VPA | intervention effect for<br>the choice group <sup>c</sup> | expert group than<br>in the control<br>group.<br><br>At follow-up<br>there were no<br>differences in<br>intention, self-<br>efficacy, goal<br>commitment and<br>goal difficulty |
|----------------------------------------------------------------------------------|--------------------------------------------------------------------------------------------------------------------------------------------------------------------------------------------------------------------------------------------------------------------------------------------------------------------------------------------------------------------------------------------------------------------------------------------------|-----------------------------------------------------|----------------------------------------------------------|---------------------------------------------------------------------------------------------------------------------------------------------------------------------------------|

|                                               |                                                                                              |                   |                                                                                                                                                                                                                                                    |                                                       |                                                                         |                                                                                                                                                        |     |
|-----------------------------------------------|----------------------------------------------------------------------------------------------|-------------------|----------------------------------------------------------------------------------------------------------------------------------------------------------------------------------------------------------------------------------------------------|-------------------------------------------------------|-------------------------------------------------------------------------|--------------------------------------------------------------------------------------------------------------------------------------------------------|-----|
| Rote et<br>al <sup>38</sup><br><br><b>RCT</b> | Female freshmen<br>students<br>n=63<br>Mean<br>age=18.6(0.7)<br>Lost to follow-up:<br>15.9 % | Social<br>support | Participants received a pedometer,<br>PA logs, and weekly-personalized<br>steps goals<br><br><i>Intervention: on a Facebook<br/>group, participants reported their<br/>steps/day, the ways in which they<br/>reached their goals, and provided</i> | Intervention: 8<br>weeks<br><br>Follow-up:<br><br>N/A | Instrument:<br><br>pedometer Yamax<br>SW-200.<br><br>Measure: steps/day | Participants in the<br>Facebook social<br>support group reported<br>a greater change in<br>steps/day than<br>participants in the<br>control group only | N/A |
|-----------------------------------------------|----------------------------------------------------------------------------------------------|-------------------|----------------------------------------------------------------------------------------------------------------------------------------------------------------------------------------------------------------------------------------------------|-------------------------------------------------------|-------------------------------------------------------------------------|--------------------------------------------------------------------------------------------------------------------------------------------------------|-----|



feedback and encouragement to other participants. Posts with information about PA **were added weekly**

*Control:* participants received e-mails including **personalized goals**, feedbacks, and information about PA

between the 7<sup>th</sup> and the 8<sup>th</sup> week

|                            |                                                                      |          |                                                                                                                                                                                                                                                                                                                                                                                                                  |                                                |                                                                                                                                                                                                   |                                                                                                                                                                                            |                                                                                                                                                                  |
|----------------------------|----------------------------------------------------------------------|----------|------------------------------------------------------------------------------------------------------------------------------------------------------------------------------------------------------------------------------------------------------------------------------------------------------------------------------------------------------------------------------------------------------------------|------------------------------------------------|---------------------------------------------------------------------------------------------------------------------------------------------------------------------------------------------------|--------------------------------------------------------------------------------------------------------------------------------------------------------------------------------------------|------------------------------------------------------------------------------------------------------------------------------------------------------------------|
| Sallis et al <sup>45</sup> | Seniors students<br>n=338<br>M=153 F=185<br>Lost to follow-up:<br>5% | SCT; TTM | <i>Intervention:</i> participants attended to lectures and laboratories. Lectures focused on PA benefits, recommendations, <b>injuries</b> , and self-management. Some topics were stage-tailored. Participants were required to write a PA plan. Two type of laboratories (adoption and maintenance of PA) <b>were available, and</b> taught aerobic, resistance, and flexibility exercise, and self-management | Intervention.<br>15 weeks<br>Follow-up:<br>N/A | Instrument: physical activity recall interview.<br>Measures:<br>Kcal/kg*week spent in the past 7 days in MPA, VPA, and very hard leisure PA;<br>hours/week of MPA and VPA;<br>minutes/weeks spent | No effect for males.<br><b>Intervention effects were found for females as regards minutes of strengthening and flexibility exercise, and for “active” females as regards Kcal/kg*week.</b> | At post-test, intervention women were less likely to be in the contemplation stage and more likely to be in the action and maintenance stages than control women |
|----------------------------|----------------------------------------------------------------------|----------|------------------------------------------------------------------------------------------------------------------------------------------------------------------------------------------------------------------------------------------------------------------------------------------------------------------------------------------------------------------------------------------------------------------|------------------------------------------------|---------------------------------------------------------------------------------------------------------------------------------------------------------------------------------------------------|--------------------------------------------------------------------------------------------------------------------------------------------------------------------------------------------|------------------------------------------------------------------------------------------------------------------------------------------------------------------|

|                                  |                                                                                                           |     |                                                                                                                                                                                                                                                                                                                                                                                                                                                                             |                                                                                                           |                                                                                         |                                                                                                                    |                                                                                                  |
|----------------------------------|-----------------------------------------------------------------------------------------------------------|-----|-----------------------------------------------------------------------------------------------------------------------------------------------------------------------------------------------------------------------------------------------------------------------------------------------------------------------------------------------------------------------------------------------------------------------------------------------------------------------------|-----------------------------------------------------------------------------------------------------------|-----------------------------------------------------------------------------------------|--------------------------------------------------------------------------------------------------------------------|--------------------------------------------------------------------------------------------------|
|                                  |                                                                                                           |     | <i>Control: general health course</i>                                                                                                                                                                                                                                                                                                                                                                                                                                       |                                                                                                           | in strengthening and<br>flexibility exercise                                            |                                                                                                                    |                                                                                                  |
| Skår et<br>al <sup>46</sup>      | University<br>students<br>n=1273<br>63.4% females<br>Mean<br>age=22.8(6.7)<br>Lost at follow-up:<br>46.8% | TPB | <i>Action planning intervention:</i><br>participants received information<br>on action planning and where<br>asked to create 3 plans for PA.<br><br><i>Coping plan intervention:</i><br>participants received information<br>on coping plans, and were asked<br>to create 3 plans for coping with<br>PA barriers<br><br><i>Planning &amp; coping intervention:</i><br>participants received both the<br>treatments previously described<br><br><i>Control: no treatment</i> | Intervention: 1<br>session (mean<br>duration<br>ranging from 9<br>to 12 minutes)<br>Follow-up: 8<br>weeks | Measure: number of<br>sessions/week of at<br>least 30 minutes of<br>PA in the past week | No intervention effect<br>on PA                                                                                    | No intervention<br>effect on intention<br>and perceived<br>behavioral control                    |
| Sriramatr<br>et al <sup>39</sup> | Female students<br>n=220<br>Mean age=19<br>Lost to follow-up:<br>10.9 at post-test;                       | SCT | <i>Intervention:</i> participants received<br>a pedometer and recorder their PA<br>on a website, where they could set<br>weekly goals and identify their<br>PA related self-efficacy and                                                                                                                                                                                                                                                                                    | Intervention: 3<br>months<br>Follow-up: 3<br>months.                                                      | Instrument: Godin<br>Leisure Time<br>Exercise<br>Questionnaire;                         | At post-test and at the<br>follow-up, participants<br>in intervention group<br>reported more<br>steps/day and more | At post-test and at<br>the follow-up<br>participants in<br>intervention group<br>reported higher |

|                        |                                                                                                                                                                                                                                                                                      |                                                                                                                                                                         |                                                  |                                                                                           |
|------------------------|--------------------------------------------------------------------------------------------------------------------------------------------------------------------------------------------------------------------------------------------------------------------------------------|-------------------------------------------------------------------------------------------------------------------------------------------------------------------------|--------------------------------------------------|-------------------------------------------------------------------------------------------|
| 20.5% at the follow-up | outcome expectations. Weekly e-mails advised participants to increase their MVPA of at least 9 minutes per week and provided feedbacks. Participants received information about benefits of PA, workouts methods, PA guidelines, and PA role models<br><i>Control:</i> no treatment. | Yamax Digi-Walker SW-701 pedometer<br>Measures: times/week of engaging in 15+ minutes of LPA, MPA and VPA, corrected by intensity coefficients; steps taken over 3 days | self-reported PA than those in the control group | self-efficacy, outcome expectations, and self-regulation than those in the control groups |
|------------------------|--------------------------------------------------------------------------------------------------------------------------------------------------------------------------------------------------------------------------------------------------------------------------------------|-------------------------------------------------------------------------------------------------------------------------------------------------------------------------|--------------------------------------------------|-------------------------------------------------------------------------------------------|

|                                                  |                                                            |     |                                                                                                                                                                                                                                                                                                                                      |                                           |                                                                                                                                         |                                                                                |                                                                                                                          |
|--------------------------------------------------|------------------------------------------------------------|-----|--------------------------------------------------------------------------------------------------------------------------------------------------------------------------------------------------------------------------------------------------------------------------------------------------------------------------------------|-------------------------------------------|-----------------------------------------------------------------------------------------------------------------------------------------|--------------------------------------------------------------------------------|--------------------------------------------------------------------------------------------------------------------------|
| Wadsworth and Hallam <sup>40</sup><br><b>RCT</b> | Female college students<br>n=91<br>Lost to follow-up: 22%. | SCT | <i>Intervention:</i> <b>Participants had access to a website and received weekly e-mails. Topics addressed were</b> self-regulation (goal setting, time management, self-monitoring, reinforcements, relapse prevention), self-efficacy, outcome expectancy, overcoming barriers, and social support. An online counsellor suggested | Intervention: 6 months<br>Follow-up : N/A | Instrument: short form of the International Physical Activity Questionnaire.<br>Measures: MET*minutes/week of MVPA in the previous week | No significant differences between intervention and control group in PA levels | No differences between intervention and control group in self-regulation, exercise self-efficacy, and outcome expectancy |
|--------------------------------------------------|------------------------------------------------------------|-----|--------------------------------------------------------------------------------------------------------------------------------------------------------------------------------------------------------------------------------------------------------------------------------------------------------------------------------------|-------------------------------------------|-----------------------------------------------------------------------------------------------------------------------------------------|--------------------------------------------------------------------------------|--------------------------------------------------------------------------------------------------------------------------|

exercise regimens and replied to questions. The web site also contained discussion boards, and exercise information

*Control:* no treatment

|                              |                                                                                |                      |                                                                                                                                                                                                                                                                                                                                      |                                                                                       |                                                                                                                                                                                                                           |                                                                                                                                                                                                                                                                                                                   |     |
|------------------------------|--------------------------------------------------------------------------------|----------------------|--------------------------------------------------------------------------------------------------------------------------------------------------------------------------------------------------------------------------------------------------------------------------------------------------------------------------------------|---------------------------------------------------------------------------------------|---------------------------------------------------------------------------------------------------------------------------------------------------------------------------------------------------------------------------|-------------------------------------------------------------------------------------------------------------------------------------------------------------------------------------------------------------------------------------------------------------------------------------------------------------------|-----|
| Werch et al <sup>19,20</sup> | n=299                                                                          | Behavior-Image Model | <i>Intervention:</i> one-on-one consultations, providing tailored gain-framed and loss-framed content addressing health behaviors, and their relation to salient image achievement. A fitness specialist provided participants with a goal plan, consisting in goals reflecting one's image/aspirations, and fitness recommendations | <i>Intervention:</i> one 25-minute consultation<br><br>Follow-up: 3 months, 12 months | <i>Instrument:</i> updated Fitness & Health Survey.<br><br>Measures: at 3 months, length of exercising, 30-day VPA, 30-day MPA, 7-day VPA, and 7-day MPA were measured.<br><br>At 12 months, only 30-day MPA was measured | At 3 months, Intervention group participants showed an increase in 30-day MPA, whereas control group decreased. From 3 to 12 months, both intervention and control groups showed a decrease in 30-days MPA, but the decrease for the intervention group was significantly smaller than that for the control group | N/A |
| <b>RCT</b>                   | Mean age=19.2(1.12)<br><br>Lost to follow-up: 5% at 3 months; 23% at 12 months |                      | <i>Control:</i> participants received a brochure including information on PA benefits, characteristics of fit people, an action plan, and a                                                                                                                                                                                          |                                                                                       |                                                                                                                                                                                                                           |                                                                                                                                                                                                                                                                                                                   |     |

---

commitment form to identify

healthy/unhealthy habits

---

*Note.* PA = physical activity; LPA = light intensity physical activity; MPA = moderate intensity physical activity; VPA = vigorous intensity physical activity; MVPA = moderate-to-vigorous intensity physical activity; RCT = randomised controlled trial = NRCT, non-randomised controlled trial; N/A = not applicable; SCT = Social-cognitive theory; TTM = Transtheoretical model of behaviour change; TPB = Theory of planned behaviour; n = number of participants; M = number of male participants; F = number of females participants; MET = metabolic equivalent of task.

<sup>a</sup>Target population, sample size, number of males and females participants (or % of females), mean age (SD) (or age range), percentage of participants lost to follow-up  
Percentage of females and age range are reported in place of, respectively, the number of males and females participants and the mean age of participants, when these data are missing in the paper.

<sup>b</sup>Data referring only to participants analysed in the study, because data for all the randomized participants were not reported.

<sup>c</sup>Physical activity outcomes are reported for 244 participants only, those who received messages on physical activity.

**Table 3** Statistical significance of the differences, and standardized mean differences of changes between intervention and control groups.

| Study                      | Statistical test used                                                                             | PA measures <sup>a</sup> | Sub-set on analysis (when applicable)                                                | <i>P</i> value | Standardized mean difference of changes |
|----------------------------|---------------------------------------------------------------------------------------------------|--------------------------|--------------------------------------------------------------------------------------|----------------|-----------------------------------------|
| Boyle et al. <sup>26</sup> | Group x time ANCOVA;<br>season of assessment used<br>as covariate                                 | Total PA                 | Female participants                                                                  | N.S.           | .28                                     |
|                            |                                                                                                   |                          | Male participants                                                                    | N.S.           | .41                                     |
|                            |                                                                                                   |                          | Participants that were inactive at<br>baseline                                       | < .05          | .46                                     |
|                            |                                                                                                   |                          | For participants that were active at<br>baseline                                     | N.S.           | - .13                                   |
| Bray et al. <sup>27</sup>  | ANCOVA; baseline<br>MVPA used as covariate;<br>pairwise simple contrasts<br>used as post-hoc test | MVPA                     | Overall ANCOVA                                                                       | .05            | N/A                                     |
|                            |                                                                                                   |                          | First year student brochure group<br>against Canada's PA Guide<br>intervention group | N.S.           | N/A                                     |
|                            |                                                                                                   |                          | First year student brochure group<br>against control group                           | .03            | .08                                     |
|                            |                                                                                                   |                          | Canada's PA Guide intervention group<br>against control group                        | N.S.           | .16                                     |

|                                 |                           |                             |     |        |       |
|---------------------------------|---------------------------|-----------------------------|-----|--------|-------|
| Brown et al. <sup>28</sup>      | 1-way ANCOVA; baseline    | MVPA                        | N/A | < .001 | .93   |
|                                 |                           | MVPA used as covariate      |     |        |       |
| Cavallo et al. <sup>29</sup>    | Linear mixed model; group | Total PA                    | N/A | N.S.   | .18   |
|                                 | x time interaction        | VPA                         | N/A | N.S.   | - .22 |
|                                 |                           | MPA                         | N/A | N.S.   | .23   |
|                                 |                           | LPA                         | N/A | N.S.   | - .23 |
| Claxton and Wells <sup>30</sup> | T-test on change scores   | MPA                         | N/A | N.S.   | .19   |
|                                 |                           | VPA                         | N/A | N.S.   | .08   |
|                                 |                           | Endurance activities        | N/A | N.S.   | .14   |
|                                 |                           | Flexibility exercise        | N/A | N.S.   | .02   |
|                                 |                           | Wight management activities | N/A | .03    | .23   |

|                             |                                                                                                                   |      |                                                          |       |       |
|-----------------------------|-------------------------------------------------------------------------------------------------------------------|------|----------------------------------------------------------|-------|-------|
| Epton et al. <sup>41</sup>  | ANCOVA and logistic regression analyses (controlling for corresponding baseline scores, sex, age and nationality) | MVPA | N/A                                                      | N.S.  | .07   |
| Franko et al. <sup>23</sup> | Mixed models for repeated measures                                                                                | MVPA | Intervention 1 against control (post-test)               | N.S.  | .06   |
|                             |                                                                                                                   |      | Intervention 1 against control (3-month follow-up)       | N.S.  | .002  |
|                             |                                                                                                                   |      | Intervention 1 against control group (6-month follow-up) | N.S.  | .18   |
|                             |                                                                                                                   |      | Intervention 2 against control group (post-test)         | N.S.  | - .05 |
|                             |                                                                                                                   |      | Intervention 2 (3-month follow-up)                       | N.S.  | - .06 |
|                             |                                                                                                                   |      | Intervention 2 against control group (6-month follow-up) | N.S.  | .21   |
| Greene et al. <sup>31</sup> | Group x time MANCOVA; sex used as a covariate                                                                     | MVPA | Overall MANCOVA                                          | < .05 |       |
|                             |                                                                                                                   |      | Baseline to post-test                                    | N/A   | 3.41  |
|                             |                                                                                                                   |      | Baseline to follow-up                                    | N/A   | 2.73  |



|                             |                                                                              |            |                                                               |         |                    |
|-----------------------------|------------------------------------------------------------------------------|------------|---------------------------------------------------------------|---------|--------------------|
| Hall and Fong <sup>21</sup> | Group x time interaction.<br><br>Planned comparisons used<br><br>as post-hoc | 30-day VPA | Time perspective group against Goal-setting group (post-test) | N.S     | .29 <sup>b</sup>   |
|                             |                                                                              |            | Time perspective group against Goal-setting group (follow-up) | N.S.    | .92 <sup>b</sup>   |
|                             |                                                                              |            | Time perspective group against control group (post-test)      | N.S     | .35 <sup>b</sup>   |
|                             |                                                                              |            | Time perspective group against control group (follow-up)      | N.S.    | .36 <sup>b</sup>   |
|                             |                                                                              |            | Goal setting group against control group (post-test)          | N.S     | 0 <sup>b</sup>     |
|                             |                                                                              |            | Goal setting group against control group (follow-up)          | N.S.    | - .58 <sup>b</sup> |
|                             |                                                                              | 7-day VPA  | Time perspective group against Goal-setting group (post-test) | N.S     | .26 <sup>b</sup>   |
|                             |                                                                              |            | Time perspective group against Goal-setting group (follow-up) | N.S     | - .15 <sup>b</sup> |
|                             |                                                                              |            | Time perspective group against control group (post-test)      | p=0.002 | .97 <sup>b</sup>   |
|                             |                                                                              |            | Time perspective group against control group (follow-up)      | N.S     | .28 <sup>b</sup>   |

|                                   |                                                                  |                  |                                                      |        |                                                                                      |
|-----------------------------------|------------------------------------------------------------------|------------------|------------------------------------------------------|--------|--------------------------------------------------------------------------------------|
|                                   |                                                                  |                  | Goal setting group against control group (post-test) | N.S.   | .77 <sup>b</sup>                                                                     |
|                                   |                                                                  |                  | Goal setting group against control group (follow-up) | N.S.   | .41 <sup>b</sup>                                                                     |
| Hivert et al. <sup>24</sup>       | Group x time repeated measures ANOVA                             | Total PA         | N/A                                                  | N.S.   | .21                                                                                  |
| Kattelman et al. <sup>32</sup>    | Mixed model repeated measures (group x time)                     | Total PA         | N/A                                                  | N.S.   | - .03                                                                                |
|                                   |                                                                  | Walking          | N/A                                                  | .05    | - .17                                                                                |
|                                   |                                                                  | MPA              | N/A                                                  | N.S.   | .05                                                                                  |
|                                   |                                                                  | VPA              | N/A                                                  | N.S.   | - .03                                                                                |
| Kozak et al. <sup>25</sup>        | Wilcoxon rank-sum tests on change values (baseline to post-test) | MVPA             | N/A                                                  | N.S.   | Standardized mean differences are not available for the rank-sum outcome reported    |
| Le Cheminant et al. <sup>33</sup> | Group x time mixed model                                         | MVPA             | N/A                                                  | N.S.   | PA data were not reported                                                            |
| Magoc et al. <sup>34</sup>        | MANOVA (using minutes/week and days/week of MPA and              | N/A              | Overall MANOVA                                       | < .001 | Means and standard deviations are reported for the whole sample, but not for the two |
|                                   |                                                                  | Days/week of MPA | N/A                                                  | .001   |                                                                                      |

|                                 |                                                   |                        |                                                                             |                                        |                                                              |
|---------------------------------|---------------------------------------------------|------------------------|-----------------------------------------------------------------------------|----------------------------------------|--------------------------------------------------------------|
|                                 | VPA), and univariate<br>group x time interactions | Days/week of<br>MPA    | N/A                                                                         | < .001                                 | groups (intervention and control)<br>separately              |
|                                 |                                                   | Minutes/week<br>of MPA | N/A                                                                         | N.S.                                   |                                                              |
|                                 |                                                   | Minutes/week<br>of VPA | N/A                                                                         | N.S.                                   |                                                              |
| Mailey et al. <sup>42</sup>     | Group x time ANOVA                                | Total PA               | N/A                                                                         | .08 <sup>c</sup>                       | .78                                                          |
| Martens et<br>al. <sup>43</sup> | ANCOVA                                            | VPA                    | N/A                                                                         | .02                                    | No post-test data reported                                   |
|                                 |                                                   | MPA                    | N/A                                                                         | N.S.                                   |                                                              |
| Ng et al. <sup>35</sup>         | Repeated measures<br>ANOVA                        | Total PA               | Males Participants                                                          | N.S.                                   | - .33                                                        |
|                                 |                                                   |                        | Females Participants                                                        | N.S.                                   | .07                                                          |
| Okazaki et<br>al. <sup>36</sup> | Group x time ANOVA                                | MVPA                   | Whole sample                                                                | : N.S.                                 | No post-test data reported                                   |
|                                 |                                                   |                        | Participants that at baseline did not<br>engage in regular university sport | < .05                                  |                                                              |
|                                 |                                                   |                        | Participants that at baseline engaged in<br>regular university sport        | N.S.                                   |                                                              |
| Parrott et al. <sup>44</sup>    |                                                   | MVPA                   | Positive framed messages group<br>against control group (post-test)         | Statistically significant <sup>d</sup> | Post-test and follow-up means<br>not reported in the article |

|                                  |                                                    |          |                                                                                   |                                                                                            |                                                                                                     |
|----------------------------------|----------------------------------------------------|----------|-----------------------------------------------------------------------------------|--------------------------------------------------------------------------------------------|-----------------------------------------------------------------------------------------------------|
|                                  | ANCOVA; pairwise comparisons used as post hoc test |          | Positive framed messages group against control group (follow-up)                  | Statistically significant <sup>d</sup>                                                     |                                                                                                     |
|                                  |                                                    |          | Negative framed messages group against control group(post-test)                   | N.S.                                                                                       |                                                                                                     |
|                                  |                                                    |          | Negative framed messages group VS Control (follow-up)                             | N.S.                                                                                       |                                                                                                     |
|                                  |                                                    |          | Positive framed messages group against Negative framed messages group (post-test) | Statistically significant <sup>d</sup> for the participants who had low baseline PA scores |                                                                                                     |
|                                  |                                                    |          | Positive framed messages group VS Negative framed messages group (follow-up)      | Statistically significant <sup>d</sup> for the participants who had low baseline PA scores |                                                                                                     |
| Priebe and Spink <sup>22</sup>   | Planned contrast using change scores               | Total PA | N/A                                                                               | N.S.                                                                                       | No data reported                                                                                    |
| Quintiliani et al. <sup>37</sup> | Linear regression modelling                        | MPA      | Expert group against control group                                                | N.S.                                                                                       | The standard deviations reported for baseline measures refers to a different number of participants |
|                                  |                                                    |          | Choice group against control group                                                | N.S.                                                                                       |                                                                                                     |
|                                  |                                                    |          | Expert group against Choice group                                                 | N.S.                                                                                       |                                                                                                     |
|                                  |                                                    | VPA      | Expert group against control group                                                | < .01                                                                                      |                                                                                                     |

|                             |                                                                                                                   |                          |                                                                               |         |                                                                                             |
|-----------------------------|-------------------------------------------------------------------------------------------------------------------|--------------------------|-------------------------------------------------------------------------------|---------|---------------------------------------------------------------------------------------------|
|                             |                                                                                                                   |                          | Choice group against Control group                                            | N.S.    | in comparison to those analyzed<br>at the follow-up                                         |
|                             |                                                                                                                   |                          | Expert group against Choice group                                             | N.S.    |                                                                                             |
| Rote et al. <sup>38</sup>   | Repeated measures<br>ANOVA (2 groups x 9<br>time points). Test of<br>simple main effects used<br>as post-hoc test | Steps/day                | Overall ANOVA                                                                 | < .0004 | Means and standard deviations<br>reported in the table refer to<br>groups of different size |
|                             |                                                                                                                   |                          | Simple main effects (from the 7 <sup>th</sup> to the<br>8 <sup>th</sup> week) | < .001  |                                                                                             |
| Sallis et al. <sup>45</sup> | ANCOVA                                                                                                            | Total leisure<br>time PA | Males Participants                                                            | N.S.    | Post-test data not reported                                                                 |
|                             |                                                                                                                   |                          | Female Participants                                                           | .03     |                                                                                             |
|                             | VPA                                                                                                               |                          | Males Participants                                                            | N.S.    |                                                                                             |
|                             |                                                                                                                   |                          | Female Participants                                                           | N.S.    |                                                                                             |
|                             | MPA                                                                                                               |                          | Males Participants                                                            | N.S.    |                                                                                             |
|                             |                                                                                                                   |                          | Female Participants                                                           | N.S.    |                                                                                             |
|                             |                                                                                                                   |                          | Males Participants                                                            | N.S.    |                                                                                             |
|                             |                                                                                                                   |                          | Female Participants                                                           | N.S.    |                                                                                             |

|                                    |                           |                      |                     |       |                                                                                         |
|------------------------------------|---------------------------|----------------------|---------------------|-------|-----------------------------------------------------------------------------------------|
|                                    |                           | Resistance exercise  | Female Participants | .001  |                                                                                         |
|                                    |                           | Flexibility exercise | Males Participants  | N.S.  |                                                                                         |
|                                    |                           |                      | Female Participants | .001  |                                                                                         |
| Skar et al. <sup>46</sup>          | ANCOVA                    | Total PA             | N/A                 | N.S.  | No baseline means and standard deviations reported for the four groups separately       |
| Sriram et al. <sup>39</sup>        | ANOVA                     | Steps/day            | Post-test           | < .01 | 1.40 <sup>e</sup>                                                                       |
|                                    |                           |                      | Follow-up           | < .01 | .73 <sup>e</sup>                                                                        |
|                                    |                           | Leisure PA           | Post-test           | < .01 | 1.25 <sup>e</sup>                                                                       |
|                                    |                           |                      | Follow-up           | < .01 | .72 <sup>e</sup>                                                                        |
| Wadsworth and Hallam <sup>40</sup> | ANCOVA                    | MVPA                 | N/A                 | N.S.  | Means and standard deviations reported in the article refer to groups of different size |
| Werch et al. <sup>19</sup>         | Repeated measures MANOVAs | Length of exercise   | N/A                 | N.S.  | .067                                                                                    |
|                                    |                           | 30-day VPA           | N/A                 | N.S.  | .017                                                                                    |
|                                    |                           | 30-day MPA           | N/A                 | .03   | .25                                                                                     |

|                            |        |            |     |      |      |
|----------------------------|--------|------------|-----|------|------|
|                            |        | 7-day VPA  | N/A | N.S. | .039 |
|                            |        | 7-day MPA  | N/A | N.S. | 0    |
| Werch et al. <sup>20</sup> | MANOVA | 30-day MPA | N/A | .04  | .29  |

*Note.* N.S. = not statistically significant,  $P > .05$ ; PA = physical activity; LPA = light intensity physical activity; MPA = moderate intensity physical activity; VPA = vigorous intensity physical activity; MVPA = moderate-to-vigorous intensity physical activity; ANOVA = analysis of variance; ANCOVA = analysis of covariance; MANOVA = multivariate analysis of variance; MANCOVA = multivariate analysis of covariance.

<sup>a</sup> Physical activity measures are reported to distinguish the results in those studies that used more than one measure of physical activity. For further specifications on the measures, like units of measurement, see Table 2.

<sup>b</sup> Sample size **varied** from baseline to post-test and follow-up, due to missing data.

<sup>c</sup> Authors considered the difference between groups statistically significant due to the characteristics of the sample.

<sup>d</sup> Authors **stated** that the difference was statistically significant, but no data were reported.

<sup>e</sup> Standardized mean difference based only on the scores of the groups with pre-test, in a Solomon 4-group design study.

**Table 4** Rating of the risk of bias of the included studies

|                            |                                                                                   |                                                                                 |                                                                                                                                |                                                                                                                                         |                       | <b>Overall<br/>risk of<br/>bias</b> |
|----------------------------|-----------------------------------------------------------------------------------|---------------------------------------------------------------------------------|--------------------------------------------------------------------------------------------------------------------------------|-----------------------------------------------------------------------------------------------------------------------------------------|-----------------------|-------------------------------------|
| <b>Study</b>               | <b>Selection bias</b>                                                             | <b>Performance bias</b>                                                         | <b>Attrition bias</b>                                                                                                          | <b>Detection bias</b>                                                                                                                   | <b>Reporting bias</b> |                                     |
| Boyle et al. <sup>26</sup> | High risk: <b>discretionary allocation</b>                                        | Low risk                                                                        | Unclear risk: dropout rate not specified                                                                                       | Low risk                                                                                                                                | Low risk              | High risk                           |
| Bray et al. <sup>27</sup>  | Unclear risk: random sequence generation method not clearly described             | Low risk                                                                        | High risk: 72.7% of the participants lost to follow up; loss not handled with ITT                                              | High risk: baseline PA refers to the 8 months before the measurement, whereas follow-up PA refers to the 6 weeks before the measurement | Low risk              | High risk                           |
| Brown et al. <sup>28</sup> | High risk: <b>discretionary allocation</b> . Potential confounders not controlled | Unclear risk<br>Authors state lack of control on intervention delivery fidelity | High risk: 65.5% of participants lost to follow-up; loss not handled with ITT. Participant's reasons for dropout not specified | Low risk                                                                                                                                | Low risk              | High risk                           |



|                                 |                                                                                                                                     |                  |                                                                                                                     |                                         |                                                                                                                                                  | Overall<br>risk of<br>bias |
|---------------------------------|-------------------------------------------------------------------------------------------------------------------------------------|------------------|---------------------------------------------------------------------------------------------------------------------|-----------------------------------------|--------------------------------------------------------------------------------------------------------------------------------------------------|----------------------------|
| Study                           | Selection bias                                                                                                                      | Performance bias | Attrition bias                                                                                                      | Detection bias                          | Reporting bias                                                                                                                                   | bias                       |
| Cavallo et al. <sup>29</sup>    | Unclear risk: randomization procedure not described                                                                                 | Low risk         | High risk: significant difference in attrition between groups                                                       | Low risk                                | Low risk                                                                                                                                         | High risk                  |
| Claxton and Wells <sup>30</sup> | High risk: block randomization procedure not described. At baseline, control group had higher mean PA level than Intervention group | Low risk         | Unclear risk: 37.3% of participants lost to follow-up; loss not handled with ITT                                    | Unclear risk: imprecise PA measure used | High risk: selective reporting (authors states that PA was measured as days of PA*duration/week, but only days/week of PA measures are reported) | High risk                  |
| Epton et al. <sup>41</sup>      | Low risk                                                                                                                            | Low risk         | Unclear risk: 23.4% of participants lost to follow-up; last observation carried forward used to impute missing data | Low risk                                | Low risk                                                                                                                                         | Unclear risk               |
| Franko et al. <sup>23</sup>     | Low risk                                                                                                                            | Low risk         | Low risk                                                                                                            | Low risk                                | Low risk                                                                                                                                         | Low risk                   |

|                             |                                                               |                  |                                                                                           |                                                                                                                                                                       |                                                                                                                                                                                                                                             | Overall      |
|-----------------------------|---------------------------------------------------------------|------------------|-------------------------------------------------------------------------------------------|-----------------------------------------------------------------------------------------------------------------------------------------------------------------------|---------------------------------------------------------------------------------------------------------------------------------------------------------------------------------------------------------------------------------------------|--------------|
| Study                       | Selection bias                                                | Performance bias | Attrition bias                                                                            | Detection bias                                                                                                                                                        | Reporting bias                                                                                                                                                                                                                              | risk of bias |
| Greene et al. <sup>31</sup> | Unclear risk: randomization procedure not described           | Low risk         | High risk: 62.8% of participants lost to follow-up; loss not handled with ITT             | Low risk                                                                                                                                                              | Low risk                                                                                                                                                                                                                                    | High risk    |
| Hall and Fong <sup>21</sup> | Unclear risk: random sequence generation method not described | Low risk         | High risk: 30.9% of participants lost to follow-up at 6 months; loss not handled with ITT | Unclear risk: the number of the participants assessed differs between different measures of PA. Outcome assessors blinding not described for interview-based measures | High risk: selective reporting (only measures of VPA from the 30-day recall measure were reported; the rationale provided by the authors to justify this choice contrasts with the choice of reporting other measures of PA in the results) | High risk    |
| Hivert et al. <sup>24</sup> | Low risk                                                      | Low risk         | Low risk                                                                                  | Low risk                                                                                                                                                              | Low risk                                                                                                                                                                                                                                    | Low risk     |

|                                      |                                                              |                                                                                                                                                                                                                      |                                                                                                                                            |                                            |                                             | Overall<br>risk of<br>bias |
|--------------------------------------|--------------------------------------------------------------|----------------------------------------------------------------------------------------------------------------------------------------------------------------------------------------------------------------------|--------------------------------------------------------------------------------------------------------------------------------------------|--------------------------------------------|---------------------------------------------|----------------------------|
| Study                                | Selection bias                                               | Performance bias                                                                                                                                                                                                     | Attrition bias                                                                                                                             | Detection bias                             | Reporting bias                              | bias                       |
| Kattelman<br>et al. <sup>32</sup>    | Low risk                                                     | Low risk                                                                                                                                                                                                             | High risk: 41 % of<br>participants lost to follow-<br>up; lost not handled with<br>ITT. Participant's reasons<br>for dropout not specified | Low risk                                   | Low risk                                    | High risk                  |
| Kozak et<br>al. <sup>25</sup>        | Low risk                                                     | Low risk                                                                                                                                                                                                             | Low risk                                                                                                                                   | Low risk                                   | Low risk                                    | Low risk                   |
| LeCheminan<br>t et al. <sup>33</sup> | Unclear risk: random<br>sequence generation not<br>described | High risk: control<br>participants were<br>advised to maintain<br>their PA habits.<br>Intervention group<br>participants were paid<br>to participate in the<br>study more than<br>control group<br>participants were | Low risk                                                                                                                                   | Unclear risk: imprecise<br>PA measure used | Unclear risk: PA data<br>partially reported | High risk                  |

|                              |                                                                                                                                    |                  |                |                                                                                                                                                      |                                                                                                                                                      | Overall      |
|------------------------------|------------------------------------------------------------------------------------------------------------------------------------|------------------|----------------|------------------------------------------------------------------------------------------------------------------------------------------------------|------------------------------------------------------------------------------------------------------------------------------------------------------|--------------|
| Study                        | Selection bias                                                                                                                     | Performance bias | Attrition bias | Detection bias                                                                                                                                       | Reporting bias                                                                                                                                       | risk of bias |
| Magoc et al. <sup>34</sup>   | Unclear risk: randomization procedure not described                                                                                | Low risk         | Low risk       | High risk: <b>PA questionnaire data</b> were not properly used. Authors do not specify what criteria was used to define a day of MPA or VPA as valid | High risk: selective reporting (measures of min/week of PA not reported; data presented for the whole sample, but not for the two groups separately) | High risk    |
| Mailey et al. <sup>42</sup>  | Unclear risk: <b>no randomization described</b>                                                                                    | Low risk         | Low risk       | Low risk                                                                                                                                             | Low risk                                                                                                                                             | Unclear risk |
| Martens et al. <sup>43</sup> | Unclear risk: at baseline, <b>groups differed in</b> days/week of MPA and VPA than control, but not in minutes/week of MPA and VPA | Low risk         | Low risk       | Unclear risk: minutes/week of PA were not measured on the whole sample. Imprecise PA measure used                                                    | Unclear risk: post-test PA data not reported                                                                                                         | Unclear risk |

|                              |                                                                                                                                                                                                                                                                                                                |                  |                                                                                                                               |                                         |                                                                                                                                                                                                                                                                    | Overall      |
|------------------------------|----------------------------------------------------------------------------------------------------------------------------------------------------------------------------------------------------------------------------------------------------------------------------------------------------------------|------------------|-------------------------------------------------------------------------------------------------------------------------------|-----------------------------------------|--------------------------------------------------------------------------------------------------------------------------------------------------------------------------------------------------------------------------------------------------------------------|--------------|
| Study                        | Selection bias                                                                                                                                                                                                                                                                                                 | Performance bias | Attrition bias                                                                                                                | Detection bias                          | Reporting bias                                                                                                                                                                                                                                                     | risk of bias |
| Ng et al. <sup>35</sup>      | High risk: intervention group participants <b>were enrolled</b> in a physical education course, unlike control participants                                                                                                                                                                                    | Low risk         | High risk: 48 % of participants lost to follow-up; lost not handled with ITT. Participant's reasons for dropout not specified | Unclear risk: imprecise PA measure used | Low risk                                                                                                                                                                                                                                                           | High risk    |
| Okazaki et al. <sup>36</sup> | High risk: no explanation of randomization, criteria to allow <b>registration</b> in the courses, and <b>requirements</b> for students randomized <b>as controls</b> to be admitted. Authors state that intervention group participants might have preferred to be more active than control group participants | Low risk         | Low risk                                                                                                                      | Low risk                                | High risk: authors <b>stated</b> that data <b>were</b> analyzed using a RMANOVA, but they reported only the results of analysis conducted analyzing participants that engaged in university sports separately from those that did not engaged in university sports | High risk    |

|                                  |                                                                             |                  |                                                                                                                     |                                                                                                                |                                                                                              | Overall      |
|----------------------------------|-----------------------------------------------------------------------------|------------------|---------------------------------------------------------------------------------------------------------------------|----------------------------------------------------------------------------------------------------------------|----------------------------------------------------------------------------------------------|--------------|
| Study                            | Selection bias                                                              | Performance bias | Attrition bias                                                                                                      | Detection bias                                                                                                 | Reporting bias                                                                               | risk of bias |
| Parrott et al. <sup>44</sup>     | Unclear risk: authors state that researchers were aware of group allocation | Low risk         | Low risk                                                                                                            | Unclear risk: PA questionnaire not properly scored. Imprecise PA measure used                                  | Unclear risk: post-test and follow-up PA data, and statistical analysis results not reported | Unclear risk |
| Priebe and Spink <sup>22</sup>   | Unclear risk: randomization procedure not described                         | Low risk         | High risk: 31.9% of participants lost to follow-up; loss not handled with ITT                                       | Unclear risk: imprecise PA measure used                                                                        | Unclear risk: no PA data reported                                                            | High risk    |
| Quintiliani et al. <sup>37</sup> | Low risk                                                                    | Low risk         | Unclear risk: 48.5% of participants lost to follow-up; last observation carried forward used to impute missing data | High risk: authors state that the number of participant vary across different PA variables due to missing data | Low risk                                                                                     | High risk    |

|                             |                                                     |                  |                |                                                                                                                                         |                                              | Overall      |
|-----------------------------|-----------------------------------------------------|------------------|----------------|-----------------------------------------------------------------------------------------------------------------------------------------|----------------------------------------------|--------------|
| Study                       | Selection bias                                      | Performance bias | Attrition bias | Detection bias                                                                                                                          | Reporting bias                               | risk of bias |
| Rote et al. <sup>38</sup>   | Low risk                                            | Low risk         | Low risk       | High risk: PA data at different time points refer to different participants, due to missing data                                        | Low risk                                     | High risk    |
| Sallis et al. <sup>45</sup> | Unclear risk: randomization procedure not described | Low risk         | Low risk       | Unclear risk: outcome assessors blinding not described for interview-based measures                                                     | Unclear risk: post-test PA data not reported | Unclear risk |
| Skår et al. <sup>46</sup>   | Low risk                                            | Low risk         | Low risk       | Unclear risk: discrepancy between the PA questionnaire described and the unit of measurement of PA outcomes. Imprecise PA measures used | Low risk                                     | Unclear risk |

|                                  |                                                     |                                                                                                                                   |                                                                             |                                          |                | Overall      |
|----------------------------------|-----------------------------------------------------|-----------------------------------------------------------------------------------------------------------------------------------|-----------------------------------------------------------------------------|------------------------------------------|----------------|--------------|
|                                  |                                                     |                                                                                                                                   |                                                                             |                                          |                | risk of      |
| Study                            | Selection bias                                      | Performance bias                                                                                                                  | Attrition bias                                                              | Detection bias                           | Reporting bias | bias         |
| Sriramatr et al. <sup>39</sup>   | Low risk                                            | High risk: intervention group participants were paid three times more to participate in the study than control group participants | Low risk                                                                    | Unclear risk: imprecise PA measures used | Low risk       | High risk    |
| Wadsworth & Hallam <sup>40</sup> | Unclear risk: randomization procedure not described | Low risk                                                                                                                          | High risk: 22% of participants lost to follow-up; loss not handled with ITT | Low risk                                 | Low risk       | High risk    |
| Werch et al. <sup>19,20</sup>    | Unclear risk: no randomization described            | Low risk                                                                                                                          | Low risk                                                                    | Low risk                                 | Low risk       | Unclear risk |

*Note.* PA = physical activity; MPA = moderate intensity physical activity; VPA = vigorous intensity physical activity; ITT = intention-to-treat analysis; ANOVA = analysis of variance; **RMANOVA = repeated measures analysis of variance.**
